# Supplementary material
Source: PubMed Central journal article supplement (PMC2861289)
Supplement: NIHMS188072-supplement-Supplementary_Figures.pdf [file NIHMS188072-supplement-Supplementary_Figures.pdf]

## Supplemental Data

### Residual Antigen Presentation after Influenza Virus Infection Affects

### CD8 T Cell Activation and Migration

David J. Zammit, Damian L. Turner, Kimberly D. Klonowski, Leo Lefrançois, and Linda S. Cauley

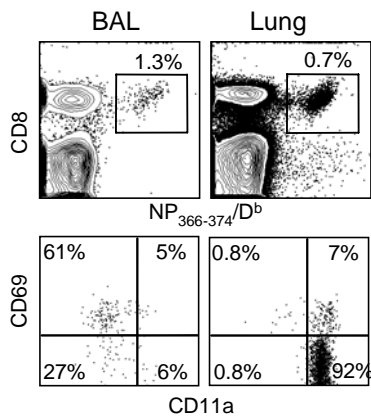

**Figure S1.** *CD11a* expression is reduced on virus-specific CD8 T cells in BAL after influenza virus infection. Mice were infected with HKx31 influenza virus and 44 days later, NP<sub>366-374</sub>/D<sup>b</sup>-specific CD8 T cells in the lung airways and parenchyma were analyzed for CD11a expression. Only 11% of the NP<sub>366-374</sub>/D<sup>b</sup>-specific CD8 T cells in the lung airways expressed CD11a at the same levels as cells found in the lung parenchyma.

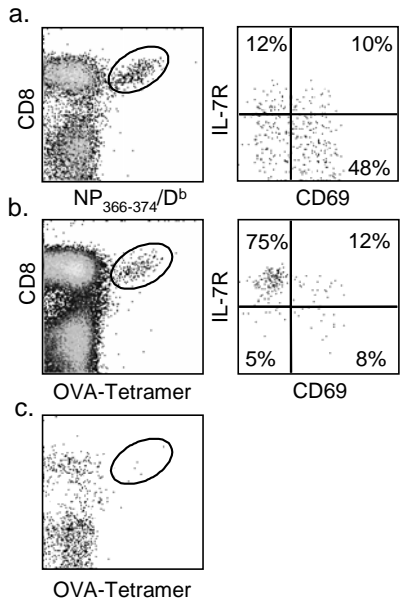

**Figure S2.** *Bystander CD8 T cells do not get activated in the lung airways during influenza virus infection.*

C57BL/6 mice were given LM-OVA by i.v. injection and eight months later were infected with E61-13-H17 influenza virus. On day 10 after E61-13-H17 infection a) NP<sub>366-374</sub>/D<sup>b</sup> and b) OVA-specific CD8 T cells in the lung airways were analyzed for CD69 and IL-7R expression. c) Very few OVA-specific cells were detected in the lung airways when no secondary infection was given.

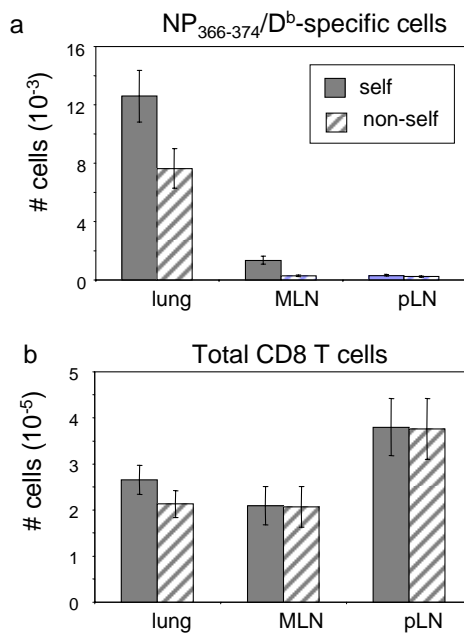

**Figure S3.** *Influenza virus-specific CD8 T cells equilibrate slowly in joined mice.* CD45.2<sup>+</sup> C57BL/6 and congenic CD45.1<sup>+</sup> partner animals were infected with HKx31 influenza virus and joined one month later. On day 15 after surgery, each mouse was analyzed for partner and self-derived CD8 T cells in the lungs, MLN and other pLN. a) Numbers of self and partner-derived NP<sub>366-374</sub>/D<sup>b</sup>-specific CD8 T cells. b) Total numbers of self and partner-derived CD8 T cells, including NP<sub>366-374</sub>/D<sup>b</sup>-specific cells (n=10).
